# Supplementary material for: Highly conserved Plasmodium vivax genomes in Duffy-negative individuals from Sudan
Source: Research Square preprint supplement (doi:10.21203/rs.3.rs-7123704/v1), 2025-08-07
Supplement: Supplementary file 1 [file 115584e40f9f85e511326b8b.docx]

Supplemental Table 8

Gene # of Sites # of Significant Sites Mutation adjusted P-value Odds Ratio Confidence Interval

DBP1 34 7 S18L *, **, *** 0.00494 0 (0, 0.23977)

A147E *, ** 0.02228 0 (0, 0.44229)

K264R *, **, *** 0.00741 0 (0, 0.29164)

K403S *, ** 0.03250 0.09713 (0.00868, 0.58158)

Q577K *, ** 0.01044 0 (0, 0.35709)

G673K * 0.09809 0 (0, 0.72241)

V875A *, **, *** 0.00875 0.06517 (0.00573, 0.39389)

DBP2/EBP 14 3 K307E *, ** 0.01529 0 (0, 0.44229)

I422T *, **, *** 0.00305 0 (0, 0.29164)

R817G *, **, *** 0.00305 0 (0, 0.29164)

MSP1 192 7 M106F * 0.08986 0 (0, 0.35709)

Y330N * 0.08986 0 (0, 0.44229)

V533E * 0.08986 0 (0, 0.44229)

S547T * 0.08986 0 (0, 0.44229)

I648V * 0.08986 0 (0, 0.35709)

L1070F * 0.08986 0 (0, 0.44229)

Q1479E * 0.08986 0 (0, 0.44229)

RBP1a 44 14 E168K * 0.05065 0.11779 (0.01054, 0.70907)

K215Q *, ** 0.025240.09713 (0.00868, 0.58158)

S249R *, **, *** 0.003840 (0, 0.29164)

L289I *, **, *** 0.003190 (0, 0.23977)

M333V * 0.063470 (0, 0.72241)

V391A*, **, *** 0.003200 (0, 0.23977)

N362T * 0.050650.11779 (0.01054, 0.70907)

P523Q *, **, *** 0.007720 (0, 0.35709)

M552T *, **, *** 0.003840 (0, 0.29164)

R561G *, **, *** 0.00384 0 (0, 0.29164)

N603D *, **, *** 0.00772 0 (0, 0.35709)

N1644K *, ** 0.01602 0 (0, 0.44229)

I2830V *, ** 0.01602 0 (0, 0.44229)

H2749Y * 0.06347 0 (0, 0.72241)

RBP1b 22 2 C152Y *, ** 0.02703 0 (0, 0.35709)

T2842I * 0.09148 0 (0, 0.55761)

RBP2a 35 17 R220S *, ** 0.01075 0 (0, 0.35709)

D307V * 0.09702 0 (0, 0.97648)

E439G *, ** 0.15398 0.07982 (0.00709, 0.47869)

M512K  *, **, *** 0.00045 0 (0, 0.16275)

N541S * 0.06426 0 (0, 0.72241)

K574T *, ** 0.01638 0 (0, 0.44229)

T612A * 0.09702 0 (0, 0.97648)

D616N * 0.09702 0 (0, 0.97648)

R933E *, ** 0.01075 0 (0, 0.35709)

I1072K * 0.08333 0.14298 (0.01279, 0.87123)

I1603T *, ** 0.01638 0 (0, 0.44229)

E2185Q * 0.08333 0.14298 (0.01279, 0.87124)

M2268K *, ** 0.02911 0 (0, 0.55761)

I2325R *, **, *** 0.00763 0 (0, 0.29164)

G2366D * 0.09702 0 (0, 0.97648)

N2406Y *, ** 0.02911 0 (0, 0.55761)

A2487V *, ** 0.02911 0 (0, 0.55761)

TRAg38 2 2 Q201P* 0.06483 0.17437 (0.01546, 1.08434)

V271E* 0.06483 0.17437 (0.01546, 1.08434)

* reject at the 0.10 significance level, ** reject at the 0.05 significance level, *** reject at the 0.01 significance level

Adjusted p-value based on FDR (Benjamini-Hochberg correction)

Supplemental Figure 1: Flowchart of filtering of epidemiological samples.
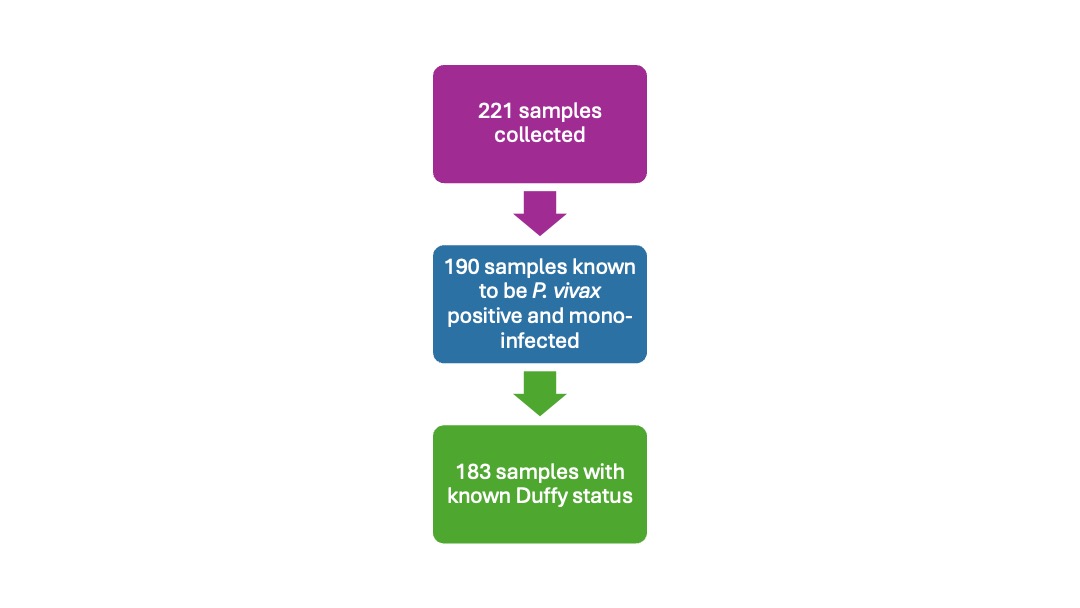


Supplemental Figure 2: Number of samples and parasitemia across collection sites of samples used in epidemiological analysis.
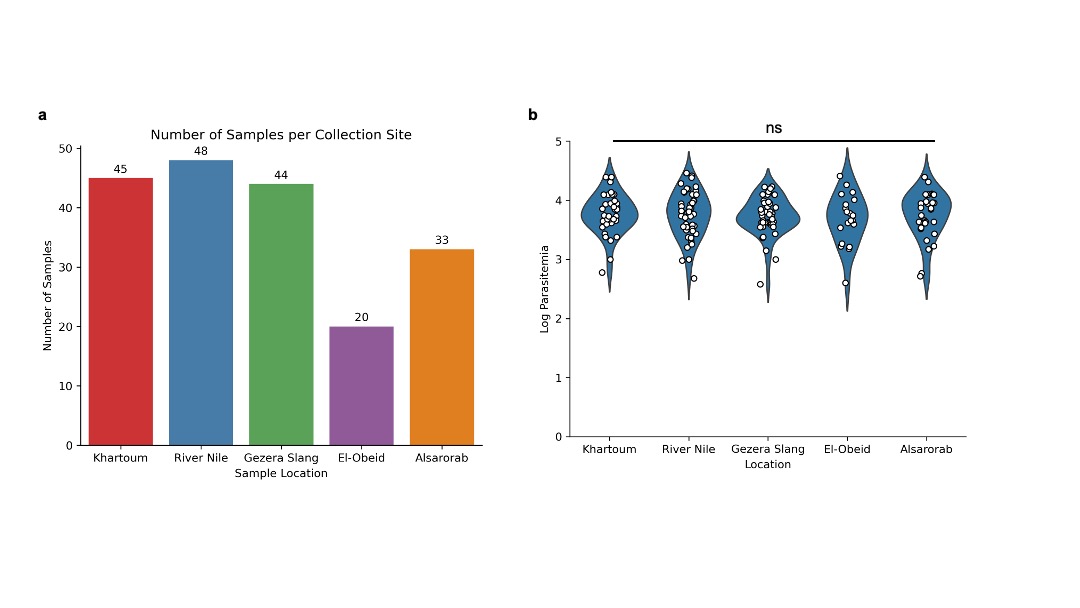


Supplemental Figure 3: Study sites of samples used in epidemiological analysis.
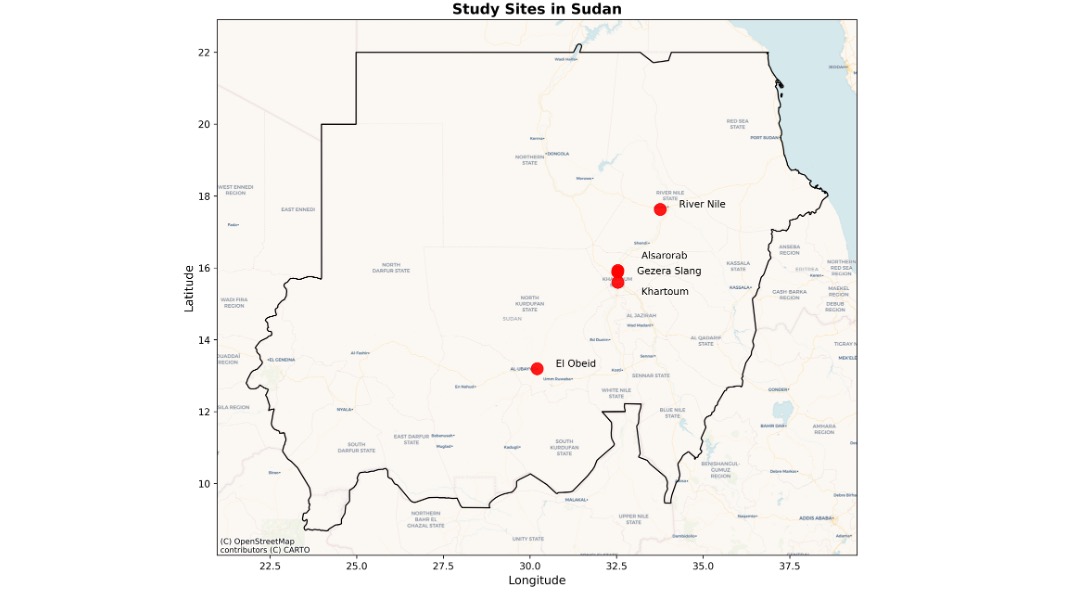
Supplemental Figure 4: Parasitemia of samples across years of collection.
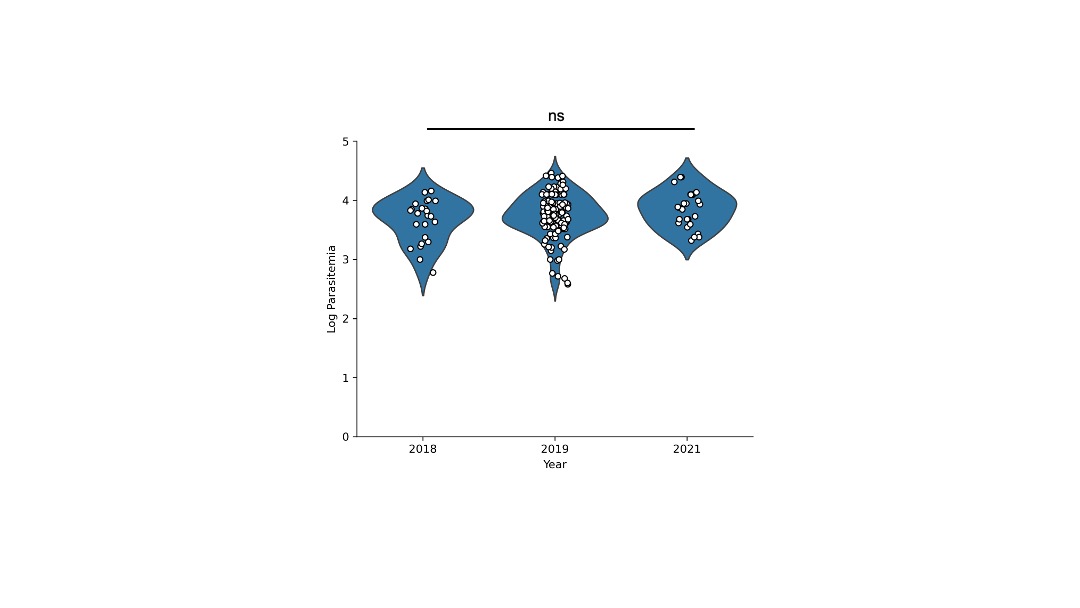


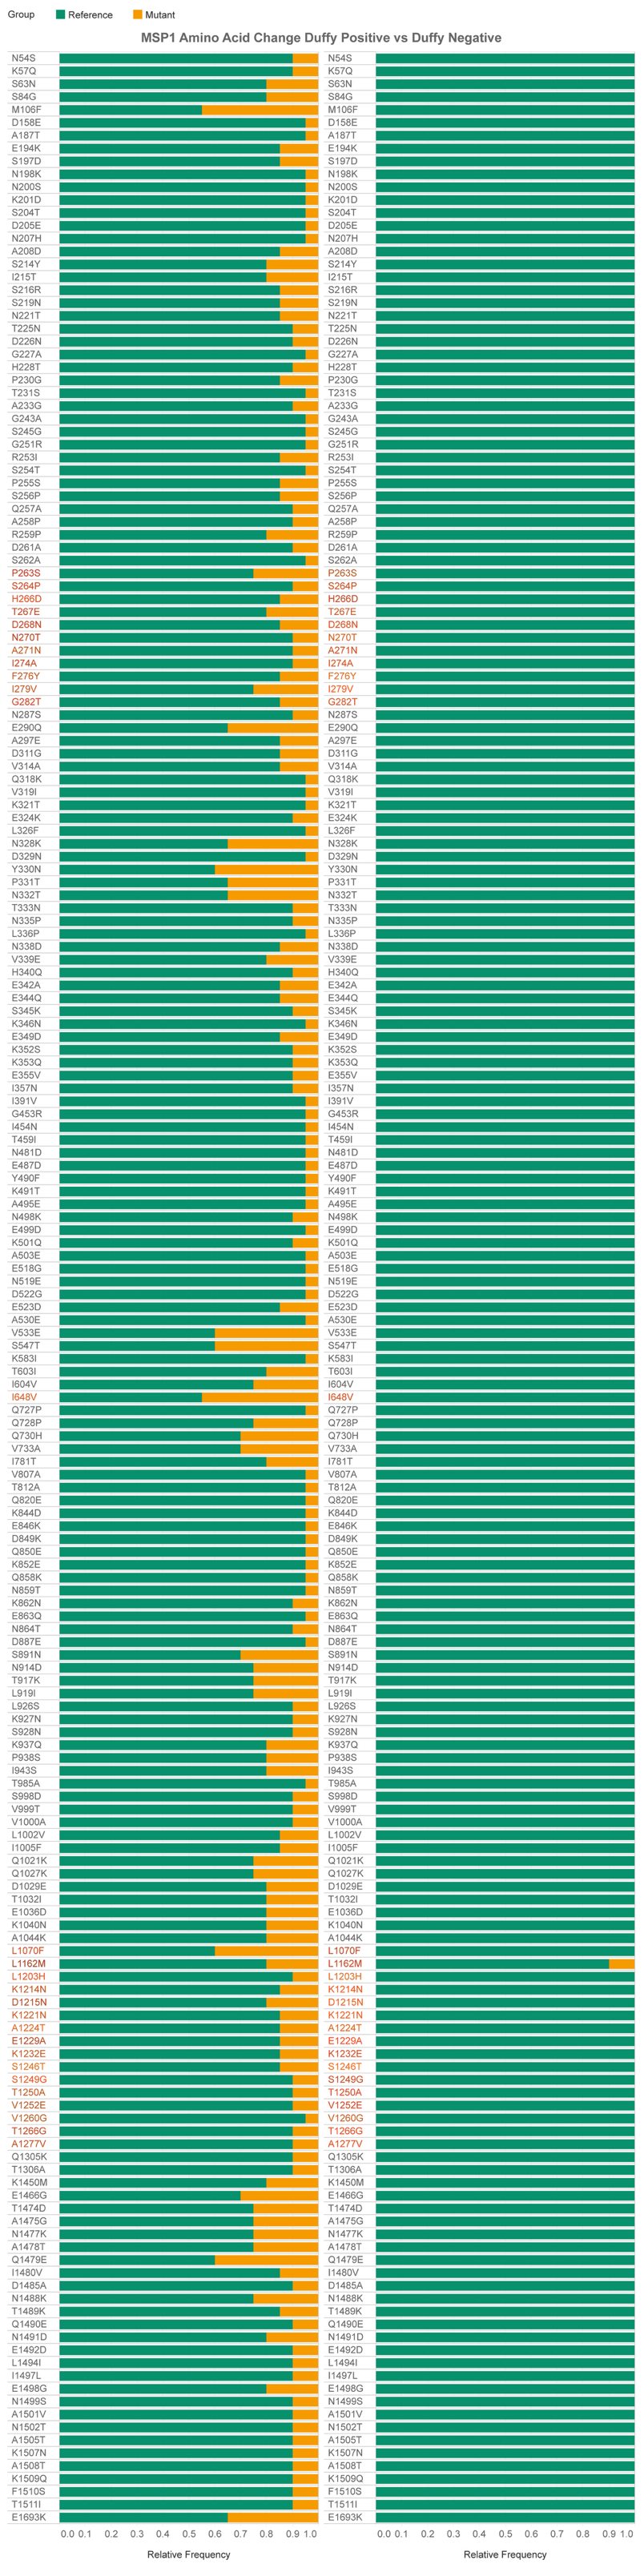

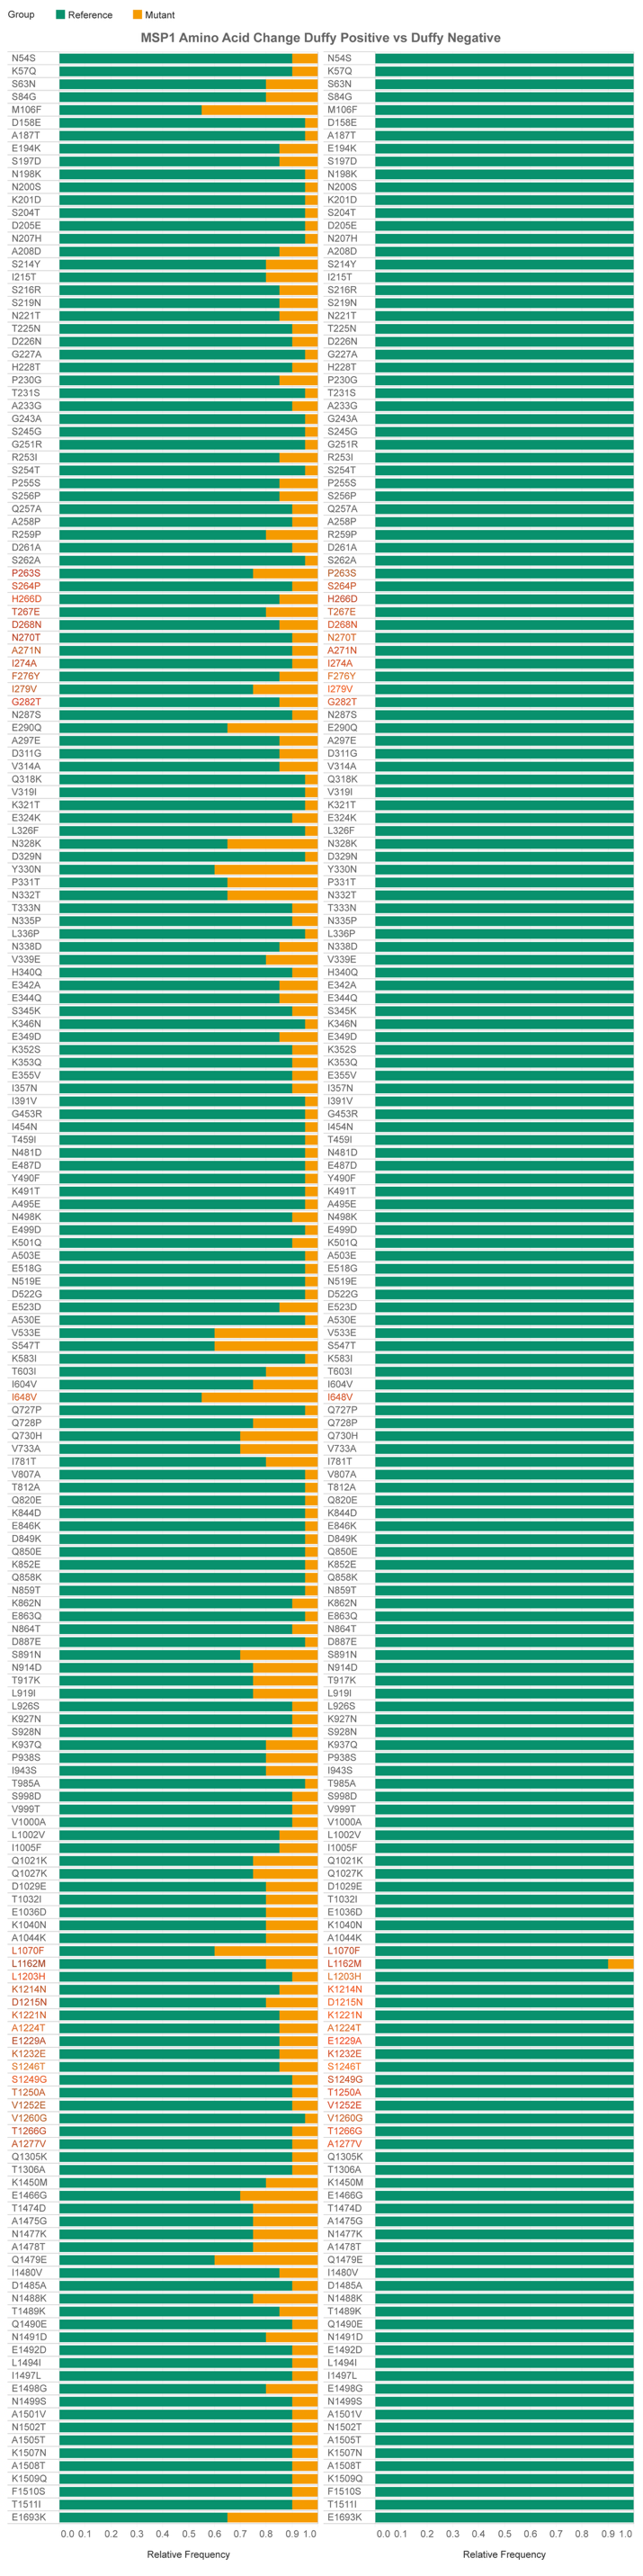
 Supplemental Figure 5: Specific amino acid mutations found in the protein MSP1.
