# Supplementary material for: Highly conserved Plasmodium vivax genomes in Duffy-negative individuals from Sudan
Source: Research Square preprint supplement (doi:10.21203/rs.3.rs-7123704/v1), 2025-08-07
Supplement: Supplementary file 2 [file 937fd9008e683e4cb9545834.xlsx]

## Sheet: Supplemental Table 1
Supplemental Table 1.	Accession numbers of samples by Duffy-status
Duffy Status	ENA Accession Number
Positive	ERR5709532
Positive	ERR5709534
Positive	ERR5709548
Positive	ERR5709549
Positive	ERR5709551
Positive	ERR5709552
Positive	ERR5709555
Positive	ERR5709556
Negative	ERR5709533
Negative	ERR5709535
Negative	ERR5709536
Negative	ERR5709550
Negative	ERR5709553
Negative	ERR5709554
Negative	ERR5709557

## Sheet: Supplemental Table 2
Supplemental Table 2.	p value statistics by either MWU or Wilcoxon Signed-Rank Tests between Duffy status and mutation type for chromsomes 1-14
Chromosome	Nonsynonymous Duffy Positive vs Negative by Mann Whitney U Test	Synonymous Duffy Positive vs Negative by Mann Whitney U Test	Nonsynonymous vs Synonymous Duffy Positive by Wilcoxon Signed-Rank Test	Nonsynonymous vs Synonymous Duffy Negative by Wilcoxon Signed-Rank Test
1	0.00030709	0.000384489	5.96e-05	0.000976563
2	0.000174001	0.000162148	5.96e-05	0.0078125
3	0.000197786	0.000329131	5.96e-05	0.0078125
4	0.000275444	0.000272274	4.77e-07	0.00195312
5	0.000147835	0.000140056	4.77e-07	0.015625
6	0.000215903	0.000334374	5.96e-05	0.00195312
7	0.000144158	0.000751624	5.96e-05	0.000488281
8	0.00013372	9.17e-05	4.77e-07	0.00390625
9	7.65e-05	7.34e-05	4.77e-07	0.000976563
10	0.000179306	0.000165747	4.77e-07	0.00195312
11	0.000182854	0.000192868	8.86e-05	0.0625
12	0.0001544	0.000171303	5.96e-05	0.015625
13	0.000378218	0.000150634	4.77e-07	0.015625
14	0.000171106	0.000162148	5.96e-05	0.0078125

## Sheet: Supplemental Table 3
Supplemental Table 3.	Coverage and mean depth per sample per chromosome
		Chromosome 1		Chromosome 2		Chromosome 3		Chromosome 4		Chromosome 5		Chromosome 6		Chromosome 7		Chromosome 8		Chromosome 9		Chromosome 10		Chromosome 11		Chromosome 12		Chromosome 13		Chromosome 14		Average		Standard Deviation		Median
Sample	Duffy Status	Coverage	Mean Depth	Coverage	Mean Depth	Coverage	Mean Depth	Coverage	Mean Depth	Coverage	Mean Depth	Coverage	Mean Depth	Coverage	Mean Depth	Coverage	Mean Depth	Coverage	Mean Depth	Coverage	Mean Depth	Coverage	Mean Depth	Coverage	Mean Depth	Coverage	Mean Depth	Coverage	Mean Depth	Coverage	Mean Depth	Coverage	Mean Depth	Coverage	Mean Depth
ERR5709532	Positive	23.9095	0.5789	22.0389	1.86931	26.1794	0.6851	23.9252	9.95004	25.9657	0.817365	28.1528	0.651397	26.5409	0.571377	26.5374	0.668632	26.2072	1.43572	26.8437	0.702737	26.3769	0.575143	26.7136	2.12179	27.6046	0.600021	27.1816	0.605754	26.0127	1.55952	1.64057	2.46878	26.4571	2.46878
ERR5709534	Positive	64.2115	1.18168	62.5113	2.08449	68.373	1.25414	61.7702	6.20274	65.8554	1.28756	69.3024	1.27796	65.83	1.24862	67.6231	1.26928	66.1103	1.84655	65.5411	1.23127	69.3428	1.26907	68.6277	1.47696	70.5277	1.31428	70.3187	1.33309	66.8532	1.73412	2.76994	1.31182	66.8667	1.31182
ERR5709548	Positive	9.40877	0.570526	8.46928	1.20714	10.0139	0.706796	8.91224	7.79512	10.5383	0.771028	10.0912	0.585305	9.6469	0.44583	9.6304	0.607872	10.0994	1.33017	9.74649	0.685975	9.33976	0.492561	9.73528	2.98161	9.56487	0.519006	9.42867	0.474367	9.6161	1.36952	0.516503	1.9643	9.63865	1.9643
ERR5709549	Positive	21.7658	0.726773	22.0141	1.53201	22.7211	0.861486	21.0592	7.93403	22.3823	1.00682	22.8288	0.732861	22.1224	0.676021	21.5017	0.776285	22.3971	1.59886	22.9583	0.826182	21.7332	0.640107	22.2746	3.25607	21.9849	0.675068	22.4877	0.656764	22.1594	1.56424	0.530717	1.96231	22.1985	1.96231
ERR5709551	Positive	77.1952	2.4562	76.0947	3.08037	83.0306	2.6159	75.0719	9.06284	78.8582	2.69302	82.6634	2.52079	79.1367	2.92772	81.8034	2.52881	80.0535	3.27234	80.6479	2.6253	83.2632	2.46363	82.3227	5.36568	83.0244	2.49097	83.5855	2.45669	80.4822	3.32573	2.83111	1.81715	81.2257	1.81715
ERR5709552	Positive	47.5454	1.04643	45.5463	1.5206	52.0139	1.18529	46.6167	7.30138	50.3095	1.29453	51.701	1.11488	48.9679	1.00371	49.4169	1.08323	49.9401	1.77257	49.4283	1.10802	51.3525	1.05523	49.8314	2.94236	51.4066	1.05761	50.7757	1.03315	49.6323	1.75136	1.93417	1.67807	49.8858	1.67807
ERR5709555	Positive	86.1293	2.8772	78.8799	3.31754	91.679	3.09175	84.5128	8.85133	87.102	3.05053	90.9927	2.99222	87.9656	2.98037	89.1768	2.91057	89.468	3.63364	88.8906	3.00337	91.032	3.0002	89.3529	4.45418	91.3455	2.9396	90.727	2.88994	88.3753	3.57089	3.44349	1.5773	89.2648	1.5773
ERR5709556	Positive	20.5348	0.604334	19.6671	1.1377	21.0214	0.714603	20.1641	6.05042	21.1297	0.8148	21.272	0.609643	21.6315	0.518157	21.2631	0.633731	21.496	1.44079	20.9982	0.691888	21.5967	0.55955	21.4263	2.20299	20.8184	0.544729	20.9827	0.555637	21.0001	1.21993	0.559404	1.46694	21.0755	1.46694
PV_1	Positive	0.642677	0.177989	0.431233	0.0573653	0.425558	0.0609042	0.363825	0.0965501	0.704545	0.177879	0.484277	0.178069	0.640718	0.567101	0.360305	0.853812	0.59663	0.255624	0.36085	0.0448063	0.622554	0.0940447	0.801976	0.21409	0.713045	0.0869826	1.13715	1.09114	0.59181	0.282597	0.214624	0.323928	0.609592	0.323928
PV_6	Positive	0.69426	0.798186	0.62625	0.0954328	0.781194	0.43712	0.674193	0.435818	0.823051	0.31554	0.770528	1.39561	0.725876	0.161956	0.757457	0.346998	0.751609	0.27669	0.646418	0.420654	0.748397	0.50374	0.724339	1.2957	0.773755	0.46281	0.702955	0.346407	0.728592	0.520904	0.0549756	0.386569	0.737136	0.386569
PV_7	Positive	74.5768	7.80727	74.6714	10.1096	76.2509	10.9069	75.5673	8.3539	81.2329	19.8144	88.8017	11.4835	85.6763	19.2253	86.7155	13.9407	87.1838	23.1056	84.5941	20.2186	90.9586	27.6548	90.9501	24.9502	92.4659	27.9979	92.1522	30.1366	84.4141	18.2647	6.74149	7.80547	86.1959	7.80547
PV_11	Positive	78.3396	13.3267	75.694	16.4331	80.8802	17.889	78.5108	12.0955	87.6389	35.8852	88.4114	17.6955	88.3433	32.0538	89.9019	26.5552	90.4299	37.307	87.1701	38.1259	92.1608	42.1418	93.1384	45.4773	93.7214	43.5185	94.2222	63.4176	87.0402	31.5659	6.19177	14.9434	88.3774	14.9434
PV_23	Positive	65.8847	9.88709	67.026	8.19958	66.3324	11.6946	67.9467	13.0507	75.4564	50.5516	73.293	12.6361	80.7686	66.1844	78.3579	30.6941	82.7168	43.3813	78.3039	34.4939	84.7079	37.032	85.5993	36.7214	85.3789	30.0612	86.1839	60.4309	76.9969	31.7871	7.71239	19.0365	78.3309	19.0365
PV_25	Positive	28.0362	2.1559	33.8736	2.18557	28.132	2.35752	26.7459	1.62267	44.9568	7.02506	31.0136	2.51813	48.1247	5.89036	42.0418	22.3974	49.1915	7.87124	45.8328	4.52858	52.895	7.28029	57.8274	12.9227	60.7288	13.3538	59.1779	13.3624	43.4699	7.53369	12.1028	6.04088	45.3948	6.04088
PV_43	Positive	78.155	20.3887	71.8067	21.0343	84.9937	27.9966	76.2695	19.6447	86.3046	64.2687	91.3132	35.7589	84.6155	42.6226	89.5421	47.6233	87.7852	69.1011	86.5692	44.8571	92.4016	73.9735	93.1985	86.1973	94.5594	82.28	95.2381	108.59	86.6252	53.1669	7.07607	28.009	87.1772	28.009
PV_47	Positive	31.7128	3.46401	28.2477	3.54147	34.3992	3.15965	31.2722	6.37094	40.6785	9.69929	42.1616	8.40653	49.1596	23.4433	50.3605	20.9841	52.0665	25.7971	53.2366	32.8965	56.1503	47.4708	67.9166	44.4838	64.7594	28.2641	62.5244	33.3063	47.4747	20.8063	13.038	15.3354	49.76	15.3354
PV_162	Positive	94.7022	21.5958	89.2538	25.0614	98.7879	27.3545	92.4443	22.8744	95.7079	45.0425	98.5619	27.4499	95.232	38.5723	96.9339	35.8879	97.3456	41.0537	94.83	41.4118	99.3032	39.6665	97.3065	48.7261	98.8826	48.0099	98.7631	58.3495	96.2896	37.2183	2.85938	11.0553	97.1202	11.0553
PV_165	Positive	89.8481	21.0032	83.877	24.478	95.1427	26.371	89.9819	20.4288	94.9366	42.6406	97.2306	26.7022	93.3065	37.1137	95.4117	36.4756	97.0921	43.7383	93.7136	45.5652	98.7905	40.0576	96.8983	47.4943	98.6252	47.7331	98.3802	61.5958	94.5168	37.2427	4.19509	12.0767	95.2772	12.0767
PV_169	Positive	76.8616	9.3832	76.1567	12.9965	80.4947	14.7929	76.7425	8.75248	85.711	24.1648	86.9396	10.7839	85.4395	19.1697	84.5172	20.3309	89.4934	20.3663	86.9878	25.0127	92.2796	25.4627	91.0103	26.5838	91.8587	22.6699	91.7287	40.965	85.4444	20.1025	5.82056	8.60871	86.3253	8.60871
PV_170	Positive	80.1397	6.61228	78.847	8.27958	80.2006	8.38184	80.241	6.99457	86.9675	11.7789	86.8327	8.30963	88.3451	10.9059	88.2785	10.3856	90.0175	11.5372	86.9537	11.7204	92.8832	10.3774	93.7954	14.829	91.6173	11.8923	93.5933	16.2563	87.0509	10.5901	5.28842	2.76949	87.623	2.76949
ERR5709533	Negative	6.64485	0.336459	7.21971	0.9151	6.97142	0.419298	6.46941	6.89868	6.95554	0.525501	7.32572	0.360882	7.10739	0.27034	7.6146	0.365385	7.16465	1.06642	7.14191	0.426388	7.66927	0.304485	6.85901	1.49951	8.18282	0.326585	7.41466	0.304992	7.19578	1.00143	0.438836	1.7354	7.15328	1.7354
ERR5709535	Negative	0.795956	0.0449884	0.98826	0.423594	1.002	0.0681942	0.79504	4.42227	0.948181	0.0953821	0.952252	0.0546879	0.889233	0.0451916	0.929093	0.0629653	0.876058	0.643654	0.857155	0.071749	0.810521	0.040039	0.834307	0.159996	0.874015	0.0494178	0.777351	0.0715443	0.880673	0.446691	0.0740421	1.15763	0.875036	1.15763
ERR5709536	Negative	1.05729	0.0552863	1.17617	0.45728	1.20798	0.0743255	0.962724	4.76043	1.18585	0.137126	1.11192	0.062537	0.962529	0.0589459	1.02879	0.073235	0.973016	0.712117	0.8824	0.0809152	0.935802	0.0465015	0.962151	0.189841	1.11222	0.0616282	0.967844	0.086055	1.03762	0.48973	0.104582	1.24395	1.0009	1.24395
ERR5709550	Negative	48.6078	1.3149	47.857	1.68373	50.8017	1.42427	48.5703	4.41319	50.1387	1.64117	50.0354	1.35118	48.5509	1.25455	49.092	1.32889	49.883	2.08276	51.4094	1.51062	50.8396	1.25224	49.9798	3.56255	50.392	1.2385	52.0603	1.27357	49.8727	1.80944	1.21019	0.965815	50.0076	0.965815
ERR5709553	Negative	1.84307	0.255472	1.97516	0.650437	2.05252	0.347965	1.95964	5.86832	2.32776	0.515128	2.33565	0.284024	2.12558	0.208466	2.16274	0.281734	2.08697	0.990416	1.96792	0.297641	2.05924	0.219001	2.07493	1.71467	2.25635	0.248641	2.07592	0.252458	2.0931	0.866741	0.141371	1.49824	2.07543	1.49824
ERR5709554	Negative	2.72751	0.40655	2.75241	1.40531	2.7213	0.513032	2.69213	10.0546	3.15842	0.630898	3.13313	0.42218	2.90841	0.379006	2.98333	0.420759	2.96831	1.27463	2.73326	0.447795	2.92293	0.353775	3.48904	2.70928	3.64915	0.423895	3.59475	0.397098	3.03101	1.41706	0.332637	2.5707	2.94562	2.5707
ERR5709557	Negative	2.89469	0.393443	3.43	1.08892	3.15634	0.430126	2.75952	8.07739	3.38238	0.81591	3.13821	0.359183	3.15704	0.76607	3.22769	0.379997	3.16522	1.16393	3.14163	0.376259	3.19512	0.375576	3.33484	2.26558	3.42489	0.325167	3.4596	0.381272	3.2048	1.22849	0.200423	2.04165	3.18017	2.04165
PV_3	Negative	0.604308	0.285743	0.665986	0.107274	0.671013	0.103711	0.58635	0.213602	0.684739	0.113565	0.635122	0.125509	0.608095	0.141001	0.61966	0.51564	0.594573	0.166948	0.622981	0.220162	0.612888	0.323121	0.60215	2.55971	0.647224	0.141424	0.592757	0.186626	0.624846	0.371717	0.0314232	0.639544	0.616274	0.639544
PV_4	Negative	0.304014	0.0721607	0.349044	0.077829	0.38017	0.156492	0.319953	0.0520669	0.370537	0.130609	0.408807	0.092565	0.35619	0.129457	0.324308	0.330274	0.317246	0.178297	0.328826	0.0300895	0.315218	0.109661	0.345989	0.306747	0.287119	0.0609556	0.277827	0.166097	0.334661	0.135236	0.0362925	0.0894464	0.326567	0.0894464
PV_8	Negative	0.756511	0.233157	0.821581	0.178439	0.779633	0.156718	0.735457	0.288398	0.85558	0.257776	0.853671	0.253826	0.798446	0.184032	0.760864	0.136504	0.768373	0.256519	0.755919	0.127372	0.707247	0.221991	0.754093	0.718567	0.754697	0.350358	0.747193	0.336522	0.774948	0.264298	0.0431005	0.147545	0.758687	0.147545
Average	Positive	52.5147	6.33212	50.7866	7.41105	55.0927	8.12588	51.9396	9.19345	57.163	16.155	58.1409	8.69015	58.111	15.3141	58.5066	13.8477	59.5221	17.0061	58.2127	15.5085	61.3969	18.0885	61.9726	20.7349	62.5181	18.3236	62.4646	24.8927	57.7387	14.2588	4.27607	7.0319	58.4771	7.0319
Standard Deviation	Positive	32.0135	7.34505	30.5701	8.27563	33.5584	9.75778	31.8608	6.08297	33.4311	20.3686	34.9952	10.5723	33.5536	19.0031	34.3436	15.1768	34.5241	20.1459	33.5389	17.6692	35.682	21.8851	35.3639	23.6897	35.7167	22.7938	35.8106	31.1445	33.7237	16.0877	3.746	7.57496	34.0414	7.57496
Median	Positive	65.0481	2.6667	64.7686	3.19896	67.3527	2.85383	64.8585	8.14396	70.6559	5.0378	71.2977	2.75651	72.4834	4.43537	72.9905	6.64809	73.0819	5.75244	71.9225	3.76598	76.303	5.14025	75.4752	9.14419	76.776	7.41595	76.9521	8.12617	71.9251	5.55229	3.15143	2.61913	72.5988	2.61913
Average	Negative	6.6236	0.339816	6.72353	0.698791	6.97441	0.369413	6.58505	4.50489	7.00077	0.486307	6.99299	0.336657	6.74638	0.343706	6.87431	0.389538	6.87974	0.853569	6.98414	0.358899	7.00678	0.324639	6.92363	1.56865	7.15805	0.322657	7.19682	0.345623	6.90501	0.803083	0.26129	1.20899	6.89396	1.20899
Standard Deviation	Negative	14.8704	0.368037	14.5953	0.55886	15.5214	0.405376	14.8644	3.45211	15.2848	0.478197	15.2634	0.38095	14.8263	0.382337	14.9905	0.36298	15.2472	0.595963	15.7408	0.432521	15.5565	0.3481	15.2605	1.20052	15.3737	0.34951	15.9131	0.345675	15.2354	0.553942	0.359908	0.794122	15.2847	0.794122
Median	Negative	1.45018	0.270608	1.57567	0.553859	1.63025	0.252341	1.46118	4.59135	1.7568	0.386452	1.72378	0.268925	1.54405	0.196249	1.59577	0.34783	1.52999	0.851267	1.42516	0.258902	1.49752	0.263238	1.51854	1.60709	1.68429	0.286904	1.52188	0.278725	1.56536	0.678236	0.122977	1.20079	1.53816	1.20079

## Sheet: Supplemental Table 4
Supplemental Table 4.	Average + standard deviation of synonymous and nonsynonymous SNPs across 14 chromosomes for Duffy-positive and Duffy-negative samples
Type	Chromosome	Duffy Status	Nonsynonymous SNPs	Synonymous SNPs	Nonsynonymous SNPs per kb	Synonymous SNPs per kb
Average	1	Positive	365.3	4219.25	0.357554	4.12978
Average	2	Positive	450.95	4145.35	0.471544	4.33466
Average	3	Positive	320.7	3887.2	0.357643	4.33499
Average	4	Positive	542.6	5010.75	0.536153	4.95122
Average	5	Positive	650.5	5925.05	0.426609	3.88575
Average	6	Positive	318.55	3049.1	0.305478	2.92398
Average	7	Positive	481.35	4282.05	0.291337	2.59171
Average	8	Positive	370.9	4039.95	0.210585	2.29375
Average	9	Positive	484.65	7058.5	0.216645	3.15525
Average	10	Positive	671.2	6748.45	0.433355	4.35709
Average	11	Positive	603.35	6032.4	0.283101	2.83049
Average	12	Positive	710.8	7894.25	0.223328	2.48031
Average	13	Positive	462.2	5020.3	0.220773	2.39798
Average	14	Positive	554.25	5899.8	0.175763	1.87093
Standard Deviation	1	Positive	374.427	4361.56	0.366487	4.26907
Standard Deviation	2	Positive	421.762	3780.6	0.441023	3.95325
Standard Deviation	3	Positive	293.462	3541.5	0.327267	3.94946
Standard Deviation	4	Positive	529.621	4705.07	0.523328	4.64917
Standard Deviation	5	Positive	620.282	5467.27	0.406792	3.58553
Standard Deviation	6	Positive	274.489	2582.89	0.263225	2.4769
Standard Deviation	7	Positive	409.627	3730.73	0.247927	2.25802
Standard Deviation	8	Positive	340.205	3500.72	0.193157	1.98759
Standard Deviation	9	Positive	414.058	6385.2	0.18509	2.85428
Standard Deviation	10	Positive	577.436	5798.19	0.372817	3.74356
Standard Deviation	11	Positive	556.948	4975.94	0.261328	2.33479
Standard Deviation	12	Positive	575.374	6425.09	0.180778	2.01871
Standard Deviation	13	Positive	377.579	4039.37	0.180353	1.92943
Standard Deviation	14	Positive	434.572	4655.84	0.137811	1.47645
Average	1	Negative	20.8	234.3	0.0203589	0.229332
Average	2	Negative	16	246.9	0.0167307	0.258175
Average	3	Negative	12.8	147.7	0.0142745	0.164714
Average	4	Negative	18.2	240.8	0.0179838	0.237939
Average	5	Negative	32.3	306.7	0.0211829	0.201139
Average	6	Negative	15.7	117.6	0.0150557	0.112774
Average	7	Negative	20	162.9	0.012105	0.0985952
Average	8	Negative	11.4	174.5	0.00647254	0.0990752
Average	9	Negative	16.9	311.7	0.00755454	0.139334
Average	10	Negative	35.3	318.8	0.0227912	0.205831
Average	11	Negative	20.6	291.6	0.00966582	0.136823
Average	12	Negative	26.4	416.3	0.00829468	0.130798
Average	13	Negative	23.5	255.7	0.0112249	0.122137
Average	14	Negative	31	360.7	0.00983065	0.114384
Standard Deviation	1	Negative	60.2214	624.198	0.0589445	0.610962
Standard Deviation	2	Negative	48.1733	589.047	0.0503732	0.615947
Standard Deviation	3	Negative	34.0777	407.618	0.0380033	0.454574
Standard Deviation	4	Negative	54.0695	723.225	0.0534271	0.714632
Standard Deviation	5	Negative	96.9032	782.708	0.0635508	0.513314
Standard Deviation	6	Negative	47.577	332.977	0.0456246	0.319313
Standard Deviation	7	Negative	56.0496	385.38	0.033924	0.233252
Standard Deviation	8	Negative	27.3382	383.306	0.0155217	0.217628
Standard Deviation	9	Negative	41.2565	848.706	0.0184422	0.379384
Standard Deviation	10	Negative	102.263	846.993	0.0660256	0.546855
Standard Deviation	11	Negative	48.2751	597.095	0.0226514	0.280166
Standard Deviation	12	Negative	59.9485	804.412	0.0188354	0.25274
Standard Deviation	13	Negative	61.0705	514.823	0.0291707	0.245908
Standard Deviation	14	Negative	69.6403	701.661	0.0220842	0.222509

## Sheet: Supplemental Table 5
Table 1.	Top SNPs per chromosome across all samples
Chromosome	Duffy Status	1st most nonsynonymous SNPs		2nd most nonsynonymous SNPs		3rd most nonsynonymous SNPs		4th most nonsynonymous SNPs		5th most nonsynonymous SNPs		6th most nonsynonymous SNPs		7th most nonsynonymous SNPs		8th most nonsynonymous SNPs		9th most nonsynonymous SNPs		10th most nonsynonymous SNPs		11th most nonsynonymous SNPs
		Gene	Nonsynonymous SNPs	Gene	Nonsynonymous SNPs	Gene	Nonsynonymous SNPs	Gene	Nonsynonymous SNPs	Gene	Nonsynonymous SNPs	Gene	Nonsynonymous SNPs	Gene	Nonsynonymous SNPs	Gene	Nonsynonymous SNPs	Gene	Nonsynonymous SNPs	Gene	Nonsynonymous SNPs	Gene	Nonsynonymous SNPs
1	Positive	PVP01_0101600, PIR protein	190	PVP01_0101800, PIR protein	185	PVP01_0101400, PIR protein	173	PVP01_0101900, PIR protein	139	PVP01_0120400, PIR protein	139	PVP01_0119800, PIR protein	135	PVP01_0101500, PIR protein	121	PVP01_0101100, PIR protein	113	PVP01_0120200, PIR protein	108	PVP01_0120100, PIR protein	101	X	X
2	Positive	PVP01_0200300, PIR protein	195	PVP01_0200200, PIR protein	190	PVP01_0217400, PIR protein	138	PVP01_0217500, PIR protein	127	PVP01_0217300, PIR protein	125	PVP01_0201500, PIR protein	124	PVP01_0217600, PIR protein	121	PVP01_0217900, PIR protein	109	PVP01_0201800, PIR protein	108	PVP01_0217700, PIR protein	104
3	Positive	PVP01_0301400, PIR protein	333	PVP01_0301300, PIR protein	193	PVP01_0300300, PIR protein	184	PVP01_0300400, PIR protein	116	PVP01_0301100, PIR protein	110	PVP01_0302600, zinc finger protein, putative	100	PVP01_0304700, LISP2, liver specific protein 2	100	PVP01_0300200, PIR protein	71	PVP01_0301700, plasmodium exported protein, unknown function	69	PVP01_0300500, PIR protein	49
4	Positive	PVP01_0424100, PIR protein	271	PVP01_0424000, PIR protein	255	PVP01_0404000, PIR protein	192	PVP01_0403500, PIR protein	167	PVP01_0423700, PIR protein	156	PVP01_0403400, PIR protein	153	PVP01_0403800, PIR protein	152	PVP01_0403300, PIR protein	145	PVP01_0417200, serine repeat antigen 5 (SERA)	138	PVP01_0417600, serine repeat antigen 5 (SERA)	126	PVP01_0423800, PIR protein	126
5	Positive	PVP01_0534300, RBP2c, reticulocyte binding protein 2c	537	PVP01_0533400, PIR protein	420	PVP01_0533300, STP1 protein	183	PVP01_0533600, PIR protein	182	PVP01_0533800, PIR protein	133	PVP01_0534400, RBP2-P1, reticulocyte binding protein 2-P1	114	PVP01_0500900, PIR protein	110	PVP01_0502800, PIR protein	108	PVP01_0502700, PIR protein	105	PVP01_0502500, PIR protein	101
6	Positive	PVP01_0600800, PIR protein	306	PVP01_0600200, PIR protein	128	PVP01_0600700, PIR protein	112	PVP01_0600600, PIR protein	107	PVP01_0620400, merozoite surface protein, putative	86	PVP01_0600400, PIR protein	84	PVP01_0620700, conserved plasmodium protein, unknown function	70	PVP01_0606900, VPS14 domain-containing protein, putative	50	PVP01_0624800, PIR protein	41	PVP01_0624900, PIR protein	38
7	Positive	PVP01_0735300, PIR protein	334	PVP01_0728900, MSP1, merozoite surface protein	244	PVP01_0700100, conserved Plasmodium protein, unknown function	156	PVP01_0700600, PIR protein	133	PVP01_0700200, PIR protein	92	PVP01_0736900, PIR protein	81	PVP01_0735700, PIR protein	77	PVP01_0700300, Plasmodium exported protein, unknown function	74	VP01_0737400, Plasmodium exported protein, unknown function	66	PVP01_0737400, PIR protein	60
8	Positive	PVP01_0839400, PIR protein	215	PVP01_0838500, PIR protein	174	PVP01_0800500, PIR protein	82	PVP01_0838400, PIR protein	71	PVP01_0840200, Plasmodium exported protein, unknown function	68	PVP01_0839000, PIR protein	66	PVP01_0839200, PIR protein	65	PVP01_0840600, PIR protein	60	PVP01_0839100, PIR protein	58	PVP01_0840900, PIR protein	58
9	Positive	PVP01_0902900, hypothetical protein	122	PVP01_0900900, PIR protein	110	PVP01_0900600, PIR protein	72	PVP01_0950200, PIR protein	68	PVP01_0903200, hypothetical protein	53	PVP01_0903700, hypothetical protein	53	PVP01_0902200, hypothetical protein	52	PVP01_0941400, chromo domain-containing protein CDP, putative	52	PVP01_0903100, hypothetical protein	51	PVP01_0903400, hypothetical protein	50	PVP01_0903600, hypothetical protein	50
10	Positive	PVP01_1031400, MSP3.5, merozoite surface protein 3	350	PVP01_1031600, MSP3.2, merozoite surface protein 3	337	PVP01_1031700, MSP3.1, merozoite surface protein 3	293	PVP01_1031300, MSP3.8, merozoite surface protein 3	246	PVP01_1031500, MSP3.3, merozoite surface protein3	198	PVP01_1000200, PIR protein	177	PVP01_1031200, MSP3.9, merozoite surface protein 3	176	PVP01_1031000, MSP3.10, merozoite surface protein 3	170	PVP01_1034900, PIR protein	170	PVP01_1035100, PIR protein	147
11	Positive	PVP01_1100800, PIR protein	257	PVP01_1148600, PIR protein	242	PVP01_1148200, PIR protein	232	PVP01_1149000, PIR protein	232	PVP01_1101100, PIR protein	222	PVP01_1148300, PIR protein	201	PVP01_1148100, PIR protein	153	PVP01_1148400, PIR protein	128	PVP01_1100700, PIR protein	112	PVP01_1147900, PIR protein	82
12	Positive	PVP01_1272000, PIR protein	188	PVP01_1219800, MSP7.6, MSP7-like protein	146	PVP01_1271700, PIR protein	128	PVP01_1271800, PIR protein	114	PVP01_1271900, PIR protein	110	PVP01_1220000, MSP7E, MSP7-like protein	92	PVP01_1219700, MSP7-like protein	90	PVP01_1274500, Plasmodium exported protein, unknown function	78	PVP01_1220300, MSP7-like protein	72	PVP01_1220200, MSP7.9, MSP7-like protein	66	PVP01_1272500, PIR protein	66
13	Positive	PVP01_1347300, PIR protein	269	PVP01_1347200, PIR protein	159	PVP01_1347400, PIR protein	137	PVP01_1347700, PIR protein	131	PVP01_1347800, PIR protein	73	PVP01_1300500, PIR protein	54	PVP01_1315000, dynein-related AA-type ATPase, putative	38	PVP01_1316100, PHD2, PHD finger protein PHD2, putative	38	PVP01_1328200, P113, surface protein P113, putative	33	PVP01_1313300, BCP1, basal complex protein BCP1, putative	30	PVP01_1347500, PIR protein	30
14	Positive	PVP01_1472100, PIR Protein	116	PVP01_1470800, PIR protein	85	PVP01_1473000, PIR protein	75	PVP01_1470400, Plasmodium exported protein, unknown function	63	PVP01_1472400, PIR protein	60	PVP01_1472200, PIR protein	59	PVP01_1472300, PIR protein	55	PVP01_1470700, hypothetical protein	50	PVP01_1404700, conserved Plasmodium protein, unnknown function	46	PVP01_1471200, PIR protein	45
1	Negative	PVP01_0101900, PIR protein	43	PVP01_0102000, PIR protein	32	PVP01_0101800, PIR protein	27	PVP01_0120100, PIR protein	10	PVP01_0120400, PIR protein	8	PVP01_0101100, PIR protein	6	PVP01_0106700, converved Plasmodium protein	5	PVP01_0121100, PIR protein, VIR protein	5	PVP01_0115600, GTPase-activating protein	4	PVP01_0119200, CVC-81-95, Plasmodium exported protein (PHISTc)	4	PVP01_0119600, Plasmodium exported protein	4
2	Negative	PVP01_0221600, PIR protein	27	PVP01_0217400, PIR protein	23	PVP01_0200200, PIR protein	20	PVP01_0217900, PIR protein	17	PVP01_0220700, PIR protein	8	PVP01_0204100, Kinesin-8B, putative	7	PVP01_0221300, PIR protein	7	PVP01_220100, PIR protein	6	PVP01_217300, PIR proteinPVP01_0217500, PIR protein	5	PVP01_0217500, PIR protein	4
3	Negative	PVP01_0300400, PIR protein	18	PVP01_0314000, CRMP2, cysteine repeat modular protein 2, putative	14	PVP01_0301100, PIR protein	12	PVP01_0301700, plasmodium exported protein, unknown function	11	PVP01_0301300, PIR protein	10	PVP01_0301400, PIR protein	9	PVP01_0302600, zinc finger protein, putative	7	PVP01_0304700, LISP2, liver specific protein 2	7	PVP01_0308100, conserved plasmodium protein, unknown function	4
4	Negative	PVP01_0424100, PIR protein	32	PVP01_0424000, PIR protein	25	PVP01_0403300, PIR protein	23	PVP01_0403500, PIR protein	12	PVP01_0402900, plasmodium exported protein, unknown function	9	PVP01_0420400, HT1, hexose transporter	7	PVP01_0417000, serine repeat antigen 3 (SERA)	5	PVP01_0400300, PIR protein	4	PVP01_0404700, plasmodium exported protein, unknown function	4
5	Negative	PVP01_0534300, RBP2c, reticulocyte binding protein 2c	65	PVP01_0534400, RBP2-P1, reticulocyte binding protein 2-P1	27	PVP01_0533300, STP1 protein	25	PVP01_04534700, PIR protein	24	PVP01_0501500, PIR protein	21	PVP01_0533500, PIR protein	17	PVP01_0533900, PIR protein	16	PVP01_0533400, PIR protein	15	PVP01_0500900, PIR protein	14	PVP01_0502700, PIR protein	9
6	Negative	PVP01_0624100, PIR protein	21	PVP01_0600700, PIR protein	20	PVP01_0623800, DBP1, Duffy binding protein 1	16	PVP01_0600100, PIR protein	10	PVP01_0600600, PIR protein	9	PVP01_0606900, VPS14 domain-containing protein, putative	9	PVP01_0612100, conserved Plasmodium protein, unknown function	6	PVP01_0620400, merozoite surface protein, putative	6	PVP01_0601900, Plasmodium exported protein (PHIST), unknown function	5
7	Negative	PVP01_0700100, conserved Plasmodium protein, unknown function	35	PVP01_0735300, PIR protein	19	PVP01_0701200, RBP1a, reticulocyte binding protein 1a	9	PVP01_0703700, dynein heavy chain, putative	7	PVP01_0735800, PIR protein	7	PVP01_0700200, PIR protein	6	PVP01_0700600, PIR protein	5	PVP01_0735700, PIR protein	5	PVP01_0738000, PIR protein	5
8	Negative	PVP01_0810300, DNA2/NAM7 helicase, putative	9	PVP01_0838500, PIR protein	9	PVP01_0840900, PIR protein	9	PVP01_0800600, PIR protein	7	PVP01_0839200, PIR protein	5	PVP01_0803900, WD repeat-containing protein, putative	4	PVP01_0800700, RBP2b, reticulocyte binding protein 2b	3	PVP01_0802800, gyanylate cyclase organizer UGO, putative	3	PVP01_0804000, RING finger E3 ubiuqitin-protein ligase, putative	3
9	Negative	PVP01_0949400, PIR protein	10	PVP01_0901300, hypothetical protein	8	PVP01_0902400, hypothetical protein	7	PVP01_0926500, kelch domain-containing protein, putative	7	PVP01_0934700, conserved Plasmodium protein, unknown function	7	PVP01_948500, PEX22, peroxisome assembly protein 22, putative	6	PVP01_0934200, AMA1, apical membrane antigen 1	5	PVP01_0950000, PIR protein	5
10	Negative	PVP01_1031300, MSP3.8, merozoite surface protein 3	38	PVP01_1000500, PIR protein	29	PVP01_1031500, MSP3.3, merozoite surface protein3	21	PVP01_1001400, PIR protein	17	PVP01_1034500, PIR protein	17	PVP01_1034900, PIR protein	17	PVP01_1002200, PIR protein	15	PVP01_1001600, PIR protein	13	PVP01_1001800, PIR protein	11	PVP01_1034800, PIR protein	11
11	Negative	PVP01_1148300, PIR protein	26	PVP01_1100800, PIR protein	19	PVP01_1101100, PIR protein	17	PVP01_1149000, PIR protein	11	PVP01_1149100, PIR protein	10	PVP01_1101000, PIR protein	6	PVP01_1137700, EF hand domain-containing protein, putative	6	PVP01_1143800, KH domain-containing protien, putative	5
12	Negative	PVP01_1272000, PIR protein	21	PVP01_1272600, PIR protein	15	PVP01_1262200, fructose 1,6-bisphosphate aldolase, putative	13	PVP01_1272200, PIR protein	10	PVP01_1271800, PIR protein	9	PVP01_124400, GAPDH, glyceraldehyde-3-phosphate dehydrogenase, putative	8	PVP01_1250100, VP1, V-type H(+)-translovating pyrophosphatase, putative	7	PVP01_1261100, DDX17, ATP-dependent RNA helicase DDX17, putative	7	PVP01_1201300, PIR protein	6	PVP01_1219800, MSP7.6, MSP7-like protein	6	PVP01_1244100, CYT1, cytochrome c1, heme protein, mitochondrial, putative	6
13	Negative	PVP01_1347700, PIR protein	51	PVP01_1347400, PIR protein	31	PVP01_1347800, PIR protein	15	PVP01_1323100, PRMT1, protein arginine N-methyltransferase 1, putative	8	PVP01_1323600, vacuolar ER assembly factor VMA12, putative	7	PVP01_1338300, eIF2gamma, eukaryotic translation initiaiton factor 2 subunit gamma, putative	7	PVP01_1347500, PIR protein	5	PVP01_1313300, BCP1, basal complex protein BCP1, putative	4	PVP01_1316100, PHD2, PHD finger protein PHD2, putative	4	PVP01_1321700, MIT3, CorA-like Mg2+ transporter protein, putative	4	PVP01_1240300, conserved protein, unknown function	4
14	Negative	PVP01_1472300, PIR protein	50	PVP01_1470800, PIR protein	17	PVP01_1408500, DNA-directed RNA polymerase subunit alpha, putative	13	PVP01_1429000, CAF1, CCR4-associated factor 1, putative	11	PVP01_1438800, DRN1, debranching enzyme-associated ribonuclease, putative	10	PVP01_1442500, PABP1, polyadenylate-binding protein 1, putative	8	PVP01_1402400, RBP2a, reticulocyte binding protein2a	7	PVP01_1421500, conserved protein, unknown function	7	PVP01_1428700, protein MAP1, putative	6	PVP01_1449500, conserved Plasmodium protein, unknown function	6

## Sheet: Supplemental Table 6
Supplemental Table 5.	p value statistics by either MWU or Wilcoxon Signed-Rank Tests between Duffy status and mutation type for 44 EBPs
Gene	Nonsynonymous Duffy Positive vs Negative by Mann Whitney U Test	Synonymous Duffy Positive vs Negative by Mann Whitney U Test	Nonsynonymous vs Synonymous Duffy Positive by Wilcoxon Signed-Rank Test	Nonsynonymous vs Synonymous Duffy Negative by Wilcoxon Signed-Rank Test
AMA1	0.000796121	0.000897381	0.0151704	1
DBP1	0.0041397	0.00426551	0.0681355	1
DBP2	0.00792299	0.00694912	0.0018677	1
EBP2	1	0.00170194	0.000244141	NA
GAMA	0.00491689	0.0035665	0.000244141	1
MA	0.025217	0.000974994	0.000650024	1
MAEBL	0.0035665	0.0105853	0.180045	1
MSP1	0.000834195	0.00202114	0.00533921	1
MSP10	0.000839118	0.00193814	0.000964623	0.5
MSP1P	0.0329694	0.00206838	0.00012207	1
MSP3.10	0.00602181	0.00282836	0.00185943	1
MSP3.11	0.0404436	0.00282485	0.000978707	1
MSP3.5	0.000446218	0.00103352	0.000640354	1
MSP3.8	0.0140456	0.000390811	0.000292478	1
MSP3.9	0.00926814	0.00282836	0.00151919	1
MSP3G	0.00544519	0.00354958	0.000978707	1
MSP4	0.039795	0.00206838	0.00012207	1
MSP5	0.00310016	0.00448139	0.00170898	1
MSP9	0.00167728	0.000901358	0.00098244	1
RA	0.524518	0.00158901	0.000645116	1
RBP1a	0.00924903	0.00732859	0.257324	1
RBP1b	0.0170177	0.00202114	0.000964623	1
RBP2a	0.0030424	0.00174305	0.00582638	1
RON1	0.00470242	0.00222903	0.000961822	1
RON2	0.00278644	0.000896058	0.00157162	1
RON4	0.333636	0.00222903	0.000973057	1
RhopH3	0.00703501	0.00189562	0.0018119	NA
TRA2B	0.0611774	0.00221172	0.000956238	1
TRAG14	0.000449329	0.000407227	0.000590666	1
TRAG19	0.0152273	0.00241351	0.000975879	1
TRAG2	0.153407	0.00205752	0.000975879	1
TRAG20	0.00924874	0.000780998	0.000430074	1
TRAG21	0.333636	0.000956658	0.000640233	1
TRAG22	0.00174832	0.00445524	0.00315745	1
TRAG23	0.219828	0.00259539	0.000973057	1
TRAG24	0.145327	0.00349503	0.000950675	1
TRAG3	0.016643	0.000390186	1.53e-05	1
TRAG34	1	0.0024166	0.000975879	1
TRAG35	0.333636	0.000889652	0.000953454	NA
TRAG38	0.11246	0.000621097	0.000431991	NA
TRAG4	0.00109046	0.000387696	0.00029019	1
TRAG6	0.220397	0.000854823	0.000425309	1
TRAG7	0.00536887	0.002044	0.000950675	1
Trx-mero	0.0040914	0.000103174	0.000287347

## Sheet: Supplemental Table 7
Supplemental Table 6.	Average + standard deviation of synonymous and nonsynonymous SNPs across 44 EBPs for Duffy-positive and Duffy-negative samples
Sample	Duffy Status	Gene	Nonsynonymous SNPs	Synonymous SNPs
Average	Positive	DBP2	3.15	16.8
Average	Positive	TRAG2	0.4	17
Average	Positive	RON1	1	8.45
Average	Positive	TRAG3	1.2	55.25
Average	Positive	MSP5	16.15	7.7
Average	Positive	MSP4	0.6	24.9
Average	Positive	TRAG4	0.7	44.95
Average	Positive	TRAG6	0.25	11.2
Average	Positive	TRAG7	2.15	6.45
Average	Positive	GAMA	0.7	9.25
Average	Positive	TRAG38	0.8	10.3
Average	Positive	DBP1	8.85	7
Average	Positive	EBP2	0	5.85
Average	Positive	MSP1	34	19.45
Average	Positive	RBP1a	12	10.6
Average	Positive	TRAG35	0.1	5.25
Average	Positive	RBP1b	3.6	8.95
Average	Positive	RhopH3	2.6	8
Average	Positive	MSP1P	0.85	34.25
Average	Positive	TRAG34	0	33.75
Average	Positive	TRAG14	2.95	12.25
Average	Positive	TRA2B	0.3	9.35
Average	Positive	MA	0.7	11.95
Average	Positive	RA	0.05	6.2
Average	Positive	AMA1	8.25	9.9
Average	Positive	RON4	0.1	7.45
Average	Positive	Trx-mero	0.55	8.55
Average	Positive	MAEBL	6.4	5.9
Average	Positive	MSP3.5	39.3	148.65
Average	Positive	MSP3.9	17.35	99.55
Average	Positive	MSP3.8	30.7	123.2
Average	Positive	MSP3.10	25.35	52.2
Average	Positive	MSP3.11	1.4	63.95
Average	Positive	MSP3G	4.25	81.7
Average	Positive	TRAG19	0.65	10.7
Average	Positive	MSP10	2	7.5
Average	Positive	RON2	3	6.65
Average	Positive	TRAG20	1.25	7.8
Average	Positive	RBP2a	9.65	6.15
Average	Positive	TRAG22	1.65	6.9
Average	Positive	TRAG23	0.15	7.05
Average	Positive	MSP9	3.55	15.05
Average	Positive	TRAG24	0.2	4.2
Average	Positive	TRAG21	0.1	6.25
Standard Deviation	Positive	DBP2	3.28113	19.1273
Standard Deviation	Positive	TRAG2	0.598243	17.3509
Standard Deviation	Positive	RON1	0.973329	7.91052
Standard Deviation	Positive	TRAG3	1.47256	54.5574
Standard Deviation	Positive	MSP5	16.8407	7.54007
Standard Deviation	Positive	MSP4	0.88258	24.619
Standard Deviation	Positive	TRAG4	0.571241	45.5175
Standard Deviation	Positive	TRAG6	0.638666	9.63874
Standard Deviation	Positive	TRAG7	2.15883	6.45205
Standard Deviation	Positive	GAMA	0.732695	8.40348
Standard Deviation	Positive	TRAG38	0.951453	8.81446
Standard Deviation	Positive	DBP1	7.24224	5.56304
Standard Deviation	Positive	EBP2	0	5.2443
Standard Deviation	Positive	MSP1	37.5331	21.9796
Standard Deviation	Positive	RBP1a	11.8188	10.4801
Standard Deviation	Positive	TRAG35	0.307794	4.83273
Standard Deviation	Positive	RBP1b	4.35769	9.59427
Standard Deviation	Positive	RhopH3	2.28035	7.41975
Standard Deviation	Positive	MSP1P	1.08942	37.8319
Standard Deviation	Positive	TRAG34	0	35.8328
Standard Deviation	Positive	TRAG14	2.4165	11.484
Standard Deviation	Positive	TRA2B	0.470162	8.24797
Standard Deviation	Positive	MA	0.978721	10.8651
Standard Deviation	Positive	RA	0.223607	5.62513
Standard Deviation	Positive	AMA1	6.55242	8.2328
Standard Deviation	Positive	RON4	0.307794	6.36995
Standard Deviation	Positive	Trx-mero	0.510418	7.0746
Standard Deviation	Positive	MAEBL	5.95951	5.64661
Standard Deviation	Positive	MSP3.5	44.9492	150.034
Standard Deviation	Positive	MSP3.9	24.5556	108.288
Standard Deviation	Positive	MSP3.8	35.055	129.656
Standard Deviation	Positive	MSP3.10	32.1727	61.4951
Standard Deviation	Positive	MSP3.11	2.70283	77.125
Standard Deviation	Positive	MSP3G	4.72257	97.3713
Standard Deviation	Positive	TRAG19	0.812728	10.5785
Standard Deviation	Positive	MSP10	1.58944	6.43592
Standard Deviation	Positive	RON2	2.7338	5.62209
Standard Deviation	Positive	TRAG20	1.11803	6.51799
Standard Deviation	Positive	RBP2a	9.02205	5.73333
Standard Deviation	Positive	TRAG22	1.49649	7.00301
Standard Deviation	Positive	TRAG23	0.366348	6.8861
Standard Deviation	Positive	MSP9	3.03445	13.3159
Standard Deviation	Positive	TRAG24	0.410391	4.38418
Standard Deviation	Positive	TRAG21	0.307794	6.14624
Average	Negative	DBP2	0.1	0.2
Average	Negative	TRAG2	0.1	0.3
Average	Negative	RON1	0	0.2
Average	Negative	TRAG3	0.1	2.6
Average	Negative	MSP5	0	0.2
Average	Negative	MSP4	0	0.3
Average	Negative	TRAG4	0	1.1
Average	Negative	TRAG6	0	1
Average	Negative	TRAG7	0	0.1
Average	Negative	GAMA	0	0.2
Average	Negative	TRAG38	0.4	0.4
Average	Negative	DBP1	1.6	0.7
Average	Negative	EBP2	0	0
Average	Negative	MSP1	0.2	1
Average	Negative	RBP1a	0.9	0.3
Average	Negative	TRAG35	0	0
Average	Negative	RBP1b	0.3	0.4
Average	Negative	RhopH3	0.2	0.2
Average	Negative	MSP1P	0.1	0.2
Average	Negative	TRAG34	0	0.5
Average	Negative	TRAG14	0	0.1
Average	Negative	TRA2B	0	0.3
Average	Negative	MA	0	0.3
Average	Negative	RA	0	0.4
Average	Negative	AMA1	0.5	0.1
Average	Negative	RON4	0	0.3
Average	Negative	Trx-mero	0	0
Average	Negative	MAEBL	0.1	1.1
Average	Negative	MSP3.5	0.3	9.5
Average	Negative	MSP3.9	0.7	6.9
Average	Negative	MSP3.8	3.8	4.2
Average	Negative	MSP3.10	0.4	1.6
Average	Negative	MSP3.11	0	0.7
Average	Negative	MSP3G	0	2
Average	Negative	TRAG19	0	0.2
Average	Negative	MSP10	0	0.3
Average	Negative	RON2	0.2	0.1
Average	Negative	TRAG20	0.2	0.4
Average	Negative	RBP2a	0.7	0.1
Average	Negative	TRAG22	0.1	0.2
Average	Negative	TRAG23	0	0.4
Average	Negative	MSP9	0	0.1
Average	Negative	TRAG24	0	0.4
Average	Negative	TRAG21	0	0.1
Standard Deviation	Negative	DBP2	0.316228	0.632456
Standard Deviation	Negative	TRAG2	0.316228	0.948683
Standard Deviation	Negative	RON1	0	0.632456
Standard Deviation	Negative	TRAG3	0.316228	8.22192
Standard Deviation	Negative	MSP5	0	0.632456
Standard Deviation	Negative	MSP4	0	0.948683
Standard Deviation	Negative	TRAG4	0	3.47851
Standard Deviation	Negative	TRAG6	0	3.16228
Standard Deviation	Negative	TRAG7	0	0.316228
Standard Deviation	Negative	GAMA	0	0.632456
Standard Deviation	Negative	TRAG38	1.26491	1.26491
Standard Deviation	Negative	DBP1	4.40202	1.63639
Standard Deviation	Negative	EBP2	0	0
Standard Deviation	Negative	MSP1	0.632456	3.16228
Standard Deviation	Negative	RBP1a	2.84605	0.674949
Standard Deviation	Negative	TRAG35	0	0
Standard Deviation	Negative	RBP1b	0.948683	1.26491
Standard Deviation	Negative	RhopH3	0.632456	0.632456
Standard Deviation	Negative	MSP1P	0.316228	0.632456
Standard Deviation	Negative	TRAG34	0	1.58114
Standard Deviation	Negative	TRAG14	0	0.316228
Standard Deviation	Negative	TRA2B	0	0.948683
Standard Deviation	Negative	MA	0	0.948683
Standard Deviation	Negative	RA	0	1.26491
Standard Deviation	Negative	AMA1	1.58114	0.316228
Standard Deviation	Negative	RON4	0	0.948683
Standard Deviation	Negative	Trx-mero	0	0
Standard Deviation	Negative	MAEBL	0.316228	3.14289
Standard Deviation	Negative	MSP3.5	0.948683	30.0416
Standard Deviation	Negative	MSP3.9	2.21359	21.8197
Standard Deviation	Negative	MSP3.8	12.0167	13.2816
Standard Deviation	Negative	MSP3.10	1.26491	5.05964
Standard Deviation	Negative	MSP3.11	0	2.21359
Standard Deviation	Negative	MSP3G	0	6.32456
Standard Deviation	Negative	TRAG19	0	0.632456
Standard Deviation	Negative	MSP10	0	0.674949
Standard Deviation	Negative	RON2	0.632456	0.316228
Standard Deviation	Negative	TRAG20	0.632456	1.26491
Standard Deviation	Negative	RBP2a	2.21359	0.316228
Standard Deviation	Negative	TRAG22	0.316228	0.632456
Standard Deviation	Negative	TRAG23	0	1.26491
Standard Deviation	Negative	MSP9	0	0.316228
Standard Deviation	Negative	TRAG24	0	1.26491
Standard Deviation	Negative	TRAG21	0	0.316228
